# Supplementary material for: Ancestry-specific recent effective population size in the Americas
Source: PubMed Central journal article supplement (PMC5967706; doi:10.1371/journal.pgen.1007385), 2018-05-24
Supplement: pgen.1007385.s006.pdf [file pgen.1007385.s006.pdf]

| <b>Population<sup>a</sup></b> | <b>2-3cM<sup>b</sup></b> | <b>3-5cM</b> | <b>5-10cM</b> | <b>10+cM</b> | <b>Total<sup>c</sup></b> |
|-------------------------------|--------------------------|--------------|---------------|--------------|--------------------------|
| <b>Colombia</b>               | 1.9                      | 1.5          | 2.4           | 1.7          | 7.6                      |
| <b>Cuba</b>                   | 1.1                      | 0.9          | 1.1           | 0.7          | 3.7                      |
| <b>Dominican Republic</b>     | 1.2                      | 1.6          | 3.3           | 3.1          | 9.2                      |
| <b>Ecuador</b>                | 1.9                      | 1.4          | 1.8           | 1.4          | 6.5                      |
| <b>Guatemala</b>              | 1.4                      | 1.4          | 2.1           | 1.6          | 6.6                      |
| <b>Honduras</b>               | 1.7                      | 1.9          | 3.5           | 2.6          | 9.7                      |
| <b>Mexico</b>                 | 1.2                      | 0.8          | 0.7           | 0.3          | 3.0                      |
| <b>Nicaragua</b>              | 2.4                      | 1.9          | 2.8           | 2.1          | 9.2                      |
| <b>Puerto Rico</b>            | 3.6                      | 6.7          | 14.8          | 10.0         | 35.1                     |
| <b>Memphis AA</b>             | 1.5                      | 0.4          | 0.2           | 0.2          | 2.3                      |
| <b>Memphis EA</b>             | 2.0                      | 0.6          | 0.3           | 0.1          | 2.9                      |
| <b>Pittsburgh AA</b>          | 1.3                      | 0.3          | 0.2           | 0.2          | 2.0                      |
| <b>Pittsburgh EA</b>          | 2.7                      | 2.6          | 2.0           | 0.3          | 7.5                      |

<sup>a</sup> Population is country of origin of grandparents for the HCHS/SOL populations (first nine populations in table). For the Health ABC populations (last four populations in table), EA is European American, AA is African American.

<sup>b</sup> Average total length of detected IBD in cM for segments with inferred length in the specified range, per pair of unrelated individuals in the sample from the population.

<sup>c</sup> Average total length of detected IBD in cM for all segments with inferred length  $\geq 2$  cM, per pair of unrelated individuals in the sample from the population.
